# Supplementary material for: Dysbiosis and compositional alterations with aging in the gut microbiota of patients with heart failure
Source: PubMed Central journal article supplement (PMC5362204; doi:10.1371/journal.pone.0174099), 2017-03-22
Supplement: pone.0174099.s002.pdf [file pone.0174099.s002.pdf]

Supplementary Table S2. Clinical Characteristics of Healthy Control Subjects

|                        | HC subjects (n = 12) |      |      |      |      |      |      |      |      |      |      |      |
|------------------------|----------------------|------|------|------|------|------|------|------|------|------|------|------|
| Age, years             | 31                   | 34   | 35   | 36   | 37   | 39   | 41   | 45   | 49   | 50   | 50   | 50   |
| Male/female            | M                    | F    | M    | F    | M    | F    | M    | M    | M    | M    | M    | M    |
| BMI, kg/m <sup>2</sup> | 27.5                 | 23.7 | 25.0 | 21.4 | 23.1 | 22.6 | 24.3 | 21.9 | 21.0 | 21.3 | 25.2 | 20.9 |
| Comorbidities          |                      |      |      |      |      |      |      |      |      |      |      |      |
| Hypertension           | No                   | No   | No   | No   | No   | No   | No   | No   | No   | No   | No   | No   |
| Diabetes mellitus      | No                   | No   | No   | No   | No   | No   | No   | No   | No   | No   | No   | No   |
| Dyslipidemia           | No                   | No   | No   | No   | No   | No   | No   | No   | No   | No   | No   | No   |
| CKD                    | No                   | No   | No   | No   | No   | No   | No   | No   | No   | No   | No   | No   |

BMI = body mass index; CKD = chronic kidney disease; F = female; HC = healthy control; M = male
