# Supplementary material for: Dysbiosis and compositional alterations with aging in the gut microbiota of patients with heart failure
Source: PubMed Central journal article supplement (PMC5362204; doi:10.1371/journal.pone.0174099), 2017-03-22
Supplement: pone.0174099.s003.pdf [file pone.0174099.s003.pdf]

Supplementary Table S3. Comparison of Clinical Characteristics of Heart Failure Patients and Healthy Control Subjects

|                                 | HC<br>(n = 12) | HF-Y<br>(n = 12) | HF-O<br>(n = 10) | p value<br>(HC vs HF-Y) | p value<br>(HF-Y vs HF-O) |
|---------------------------------|----------------|------------------|------------------|-------------------------|---------------------------|
| Age, years                      | 41.4 ± 2.0     | 47.4 ± 2.8       | 73.8 ± 2.8       | 0.095                   | <0.001                    |
| Male, %                         | 75             | 92               | 70               | 0.590                   | 0.293                     |
| BMI, kg/m <sup>2</sup>          | 23.2 ± 0.6     | 22.9 ± 1.2       | 24.9 ± 1.7       | 0.831                   | 0.339                     |
| Comorbidities                   |                |                  |                  |                         |                           |
| Hypertension, %                 | 0              | 8                | 60               | 1.000                   | 0.020                     |
| Diabetes mellitus, %            | 0              | 33               | 30               | 0.093                   | 1.000                     |
| Dyslipidemia, %                 | 0              | 33               | 40               | 0.093                   | 1.000                     |
| CKD, %                          | 0              | 33               | 70               | 0.093                   | 0.198                     |
| Ischemic etiology, %            |                | 17               | 40               |                         | 0.348                     |
| NYHA functional class           |                | 2.9 ± 0.2        | 2.4 ± 0.2        |                         | 0.054                     |
| LVEF, %                         |                | 20.0 ± 2.2       | 43.1 ± 5.8       |                         | 0.003                     |
| Medications                     |                |                  |                  |                         |                           |
| ACE inhibitors or ARBs, %       |                | 92               | 80               |                         | 0.571                     |
| β-blockers, %                   |                | 100              | 100              |                         | 1.000                     |
| Loop diuretics, %               |                | 92               | 80               |                         | 0.571                     |
| Statins, %                      |                | 17               | 70               |                         | 0.027                     |
| Aspirin, %                      |                | 17               | 30               |                         | 0.624                     |
| PPIs, %                         |                | 42               | 50               |                         | 1.000                     |
| BNP, pg/ml                      |                | 1060.6 ± 238.8   | 697.7 ± 176.0    |                         | 0.236                     |
| eGFR, ml/min/1.73m <sup>2</sup> |                | 54.7 ± 3.1       | 40.4 ± 7.4       |                         | 0.102                     |

Data are presented as mean ± SEM or percentage. Continuous variables are compared using unpaired Student *t* test. Frequencies are compared using Fisher's exact test.

ACE = angiotensin converting enzyme; ARB = angiotensin receptor blocker; BMI = body mass index; BNP = B-type natriuretic peptide; CKD = chronic kidney disease; eGFR = estimated glomerular filtration rate; HC = healthy control subjects; HF-O = older heart failure patients; HF-Y = younger heart failure patients; LVEF = left ventricular ejection fraction as assessed by echocardiography; NYHA = New York Heart Association; PPI = proton pump inhibitor
